# Supplementary material for: Molecular-dynamics simulation methods for macromolecular crystallography
Source: PubMed Central journal article supplement (PMC9815100; doi:10.1107/s2059798322011871), 2023-01-01
Supplement: d-79-00050-sup1.pdf [file d-79-00050-sup1.pdf]

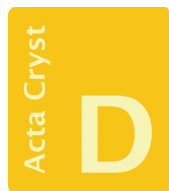

STRUCTURAL  
BIOLOGY

**Volume 79 (2023)**

**Supporting information for article:**

**Molecular-dynamics simulation methods for macromolecular  
crystallography**

**David C. Wych, Phillip C. Aoto, Lily Vu, Alexander M. Wolff, David L. Mobley,  
James S. Fraser, Susan S. Taylor and Michael E. Wall**

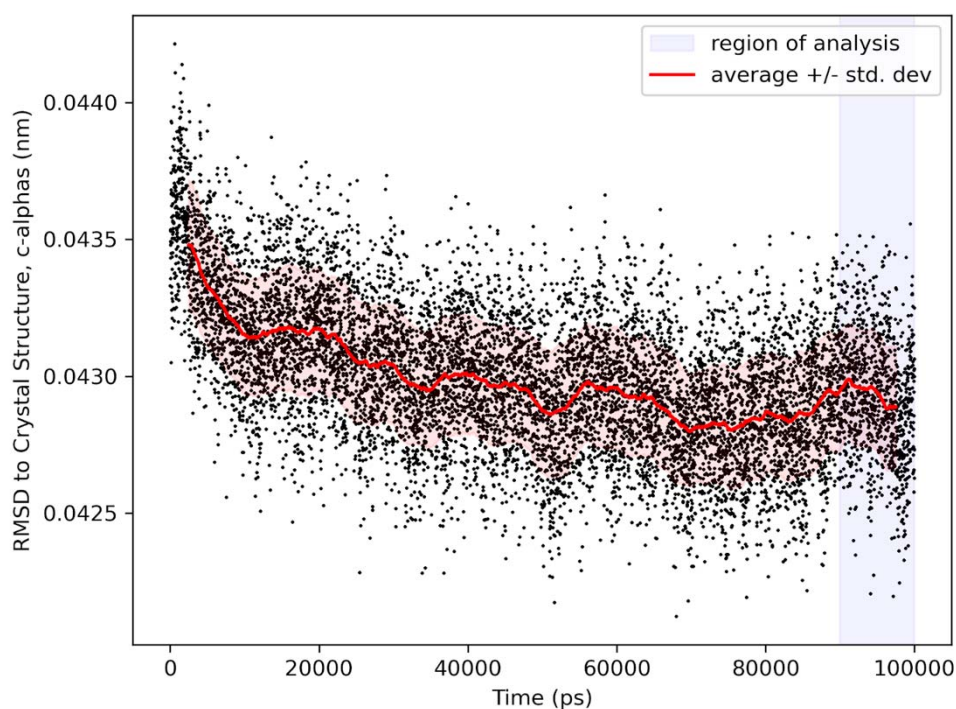

**Figure S1** The c-alpha RMSD (nm) between the coordinates from the initial MD ensemble and the coordinates from production simulation. The moving average (red line) +/- standard deviation (transparent red envelope) is plotted with a window size of 5 ns (500 frames). The portion of the trajectory in which frames were processed to calculate structure factors and densities (the “region of analysis”) is marked in blue.

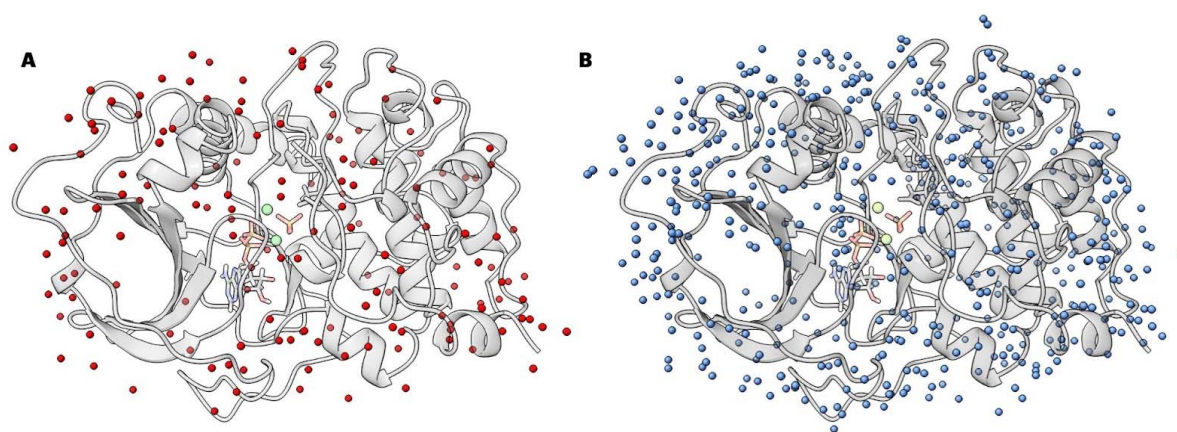

**Figure S2** A comparison of the ordered water model from (A) the initial crystal structure model,  $S$  with 148 waters (red spheres), and (B) the MD-revised model  $R_r$  with 494 waters (blue spheres). Many of the additional waters in  $R_r$  appear in the first and second hydration layers.
